# Supplementary material for: Collusion of α-Synuclein and Aβ aggravating co-morbidities in a novel prion-type mouse model
Source: PubMed Central journal article supplement (PMC8427941; doi:10.1186/s13024-021-00486-9), 2021-09-09
Supplement: 13024_2021_486_MOESM1_ESM.pdf [file 13024_2021_486_MOESM1_ESM.pdf]

# Hippocampus

# Cortex

nTg

81A

2H6

p62

81A

2H6

p62

L85

81A

2H6

p62

81A

2H6

p62

Supplemental Figure 1

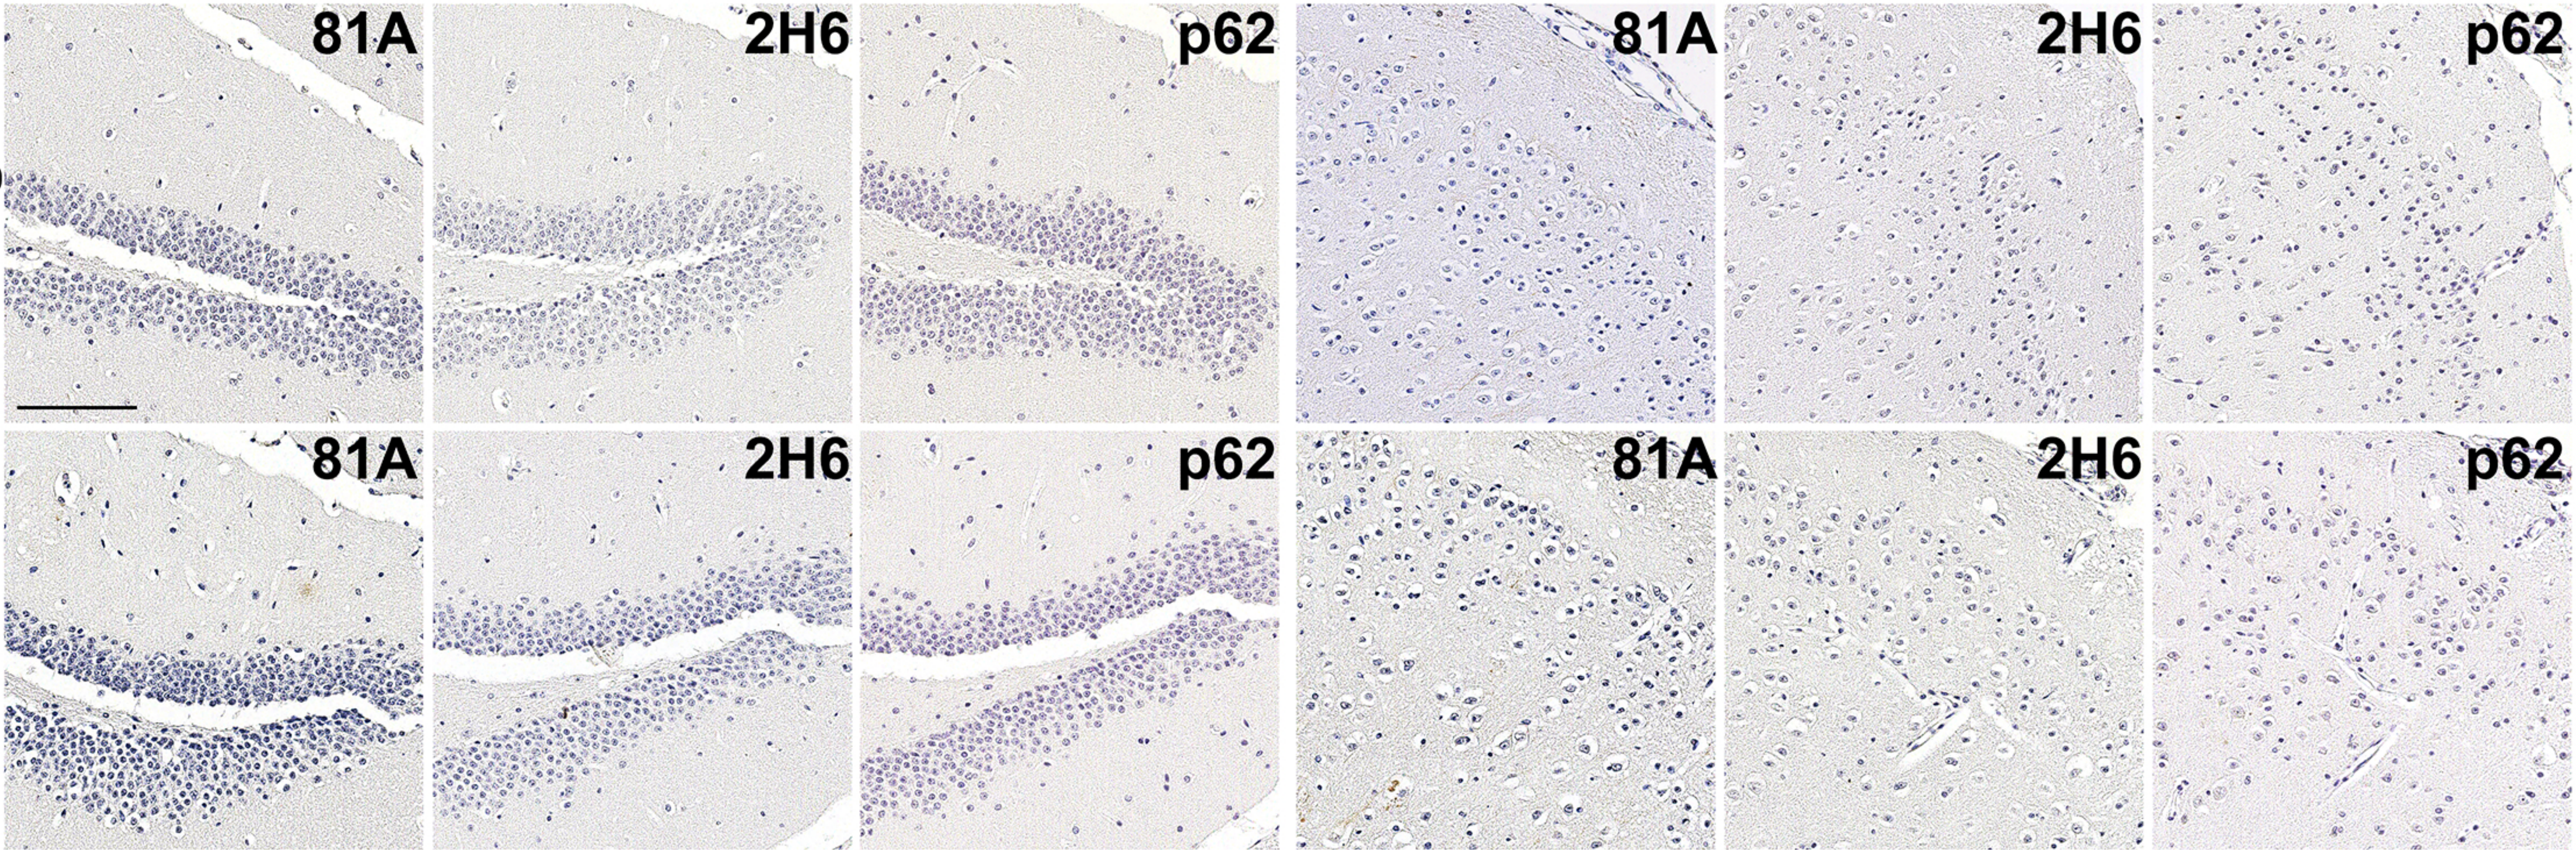



**$\alpha$ Syn PFF-injected, 10mo (4m.p.i.)**

**nTg**

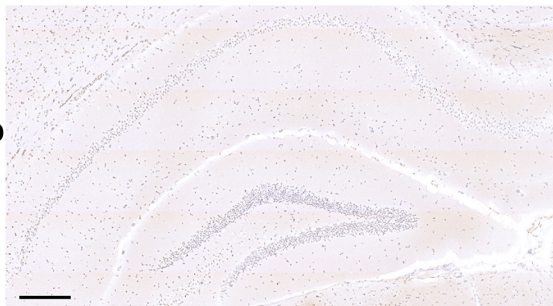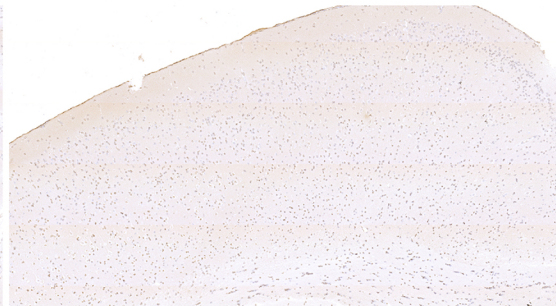

**M20**

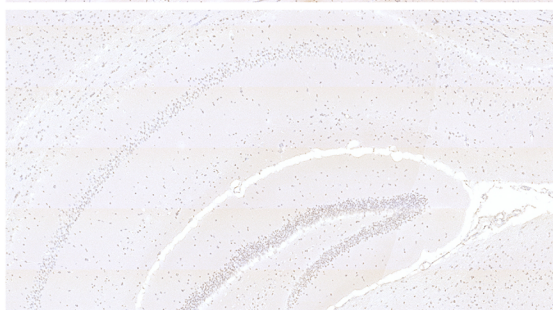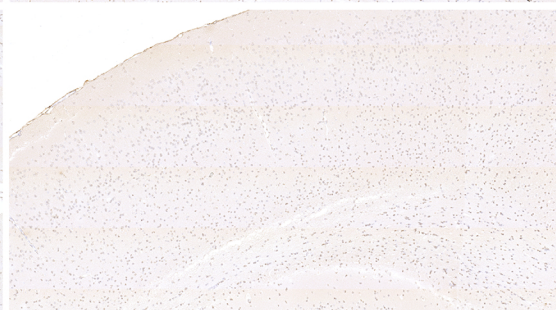

**Supplemental Figure 2**

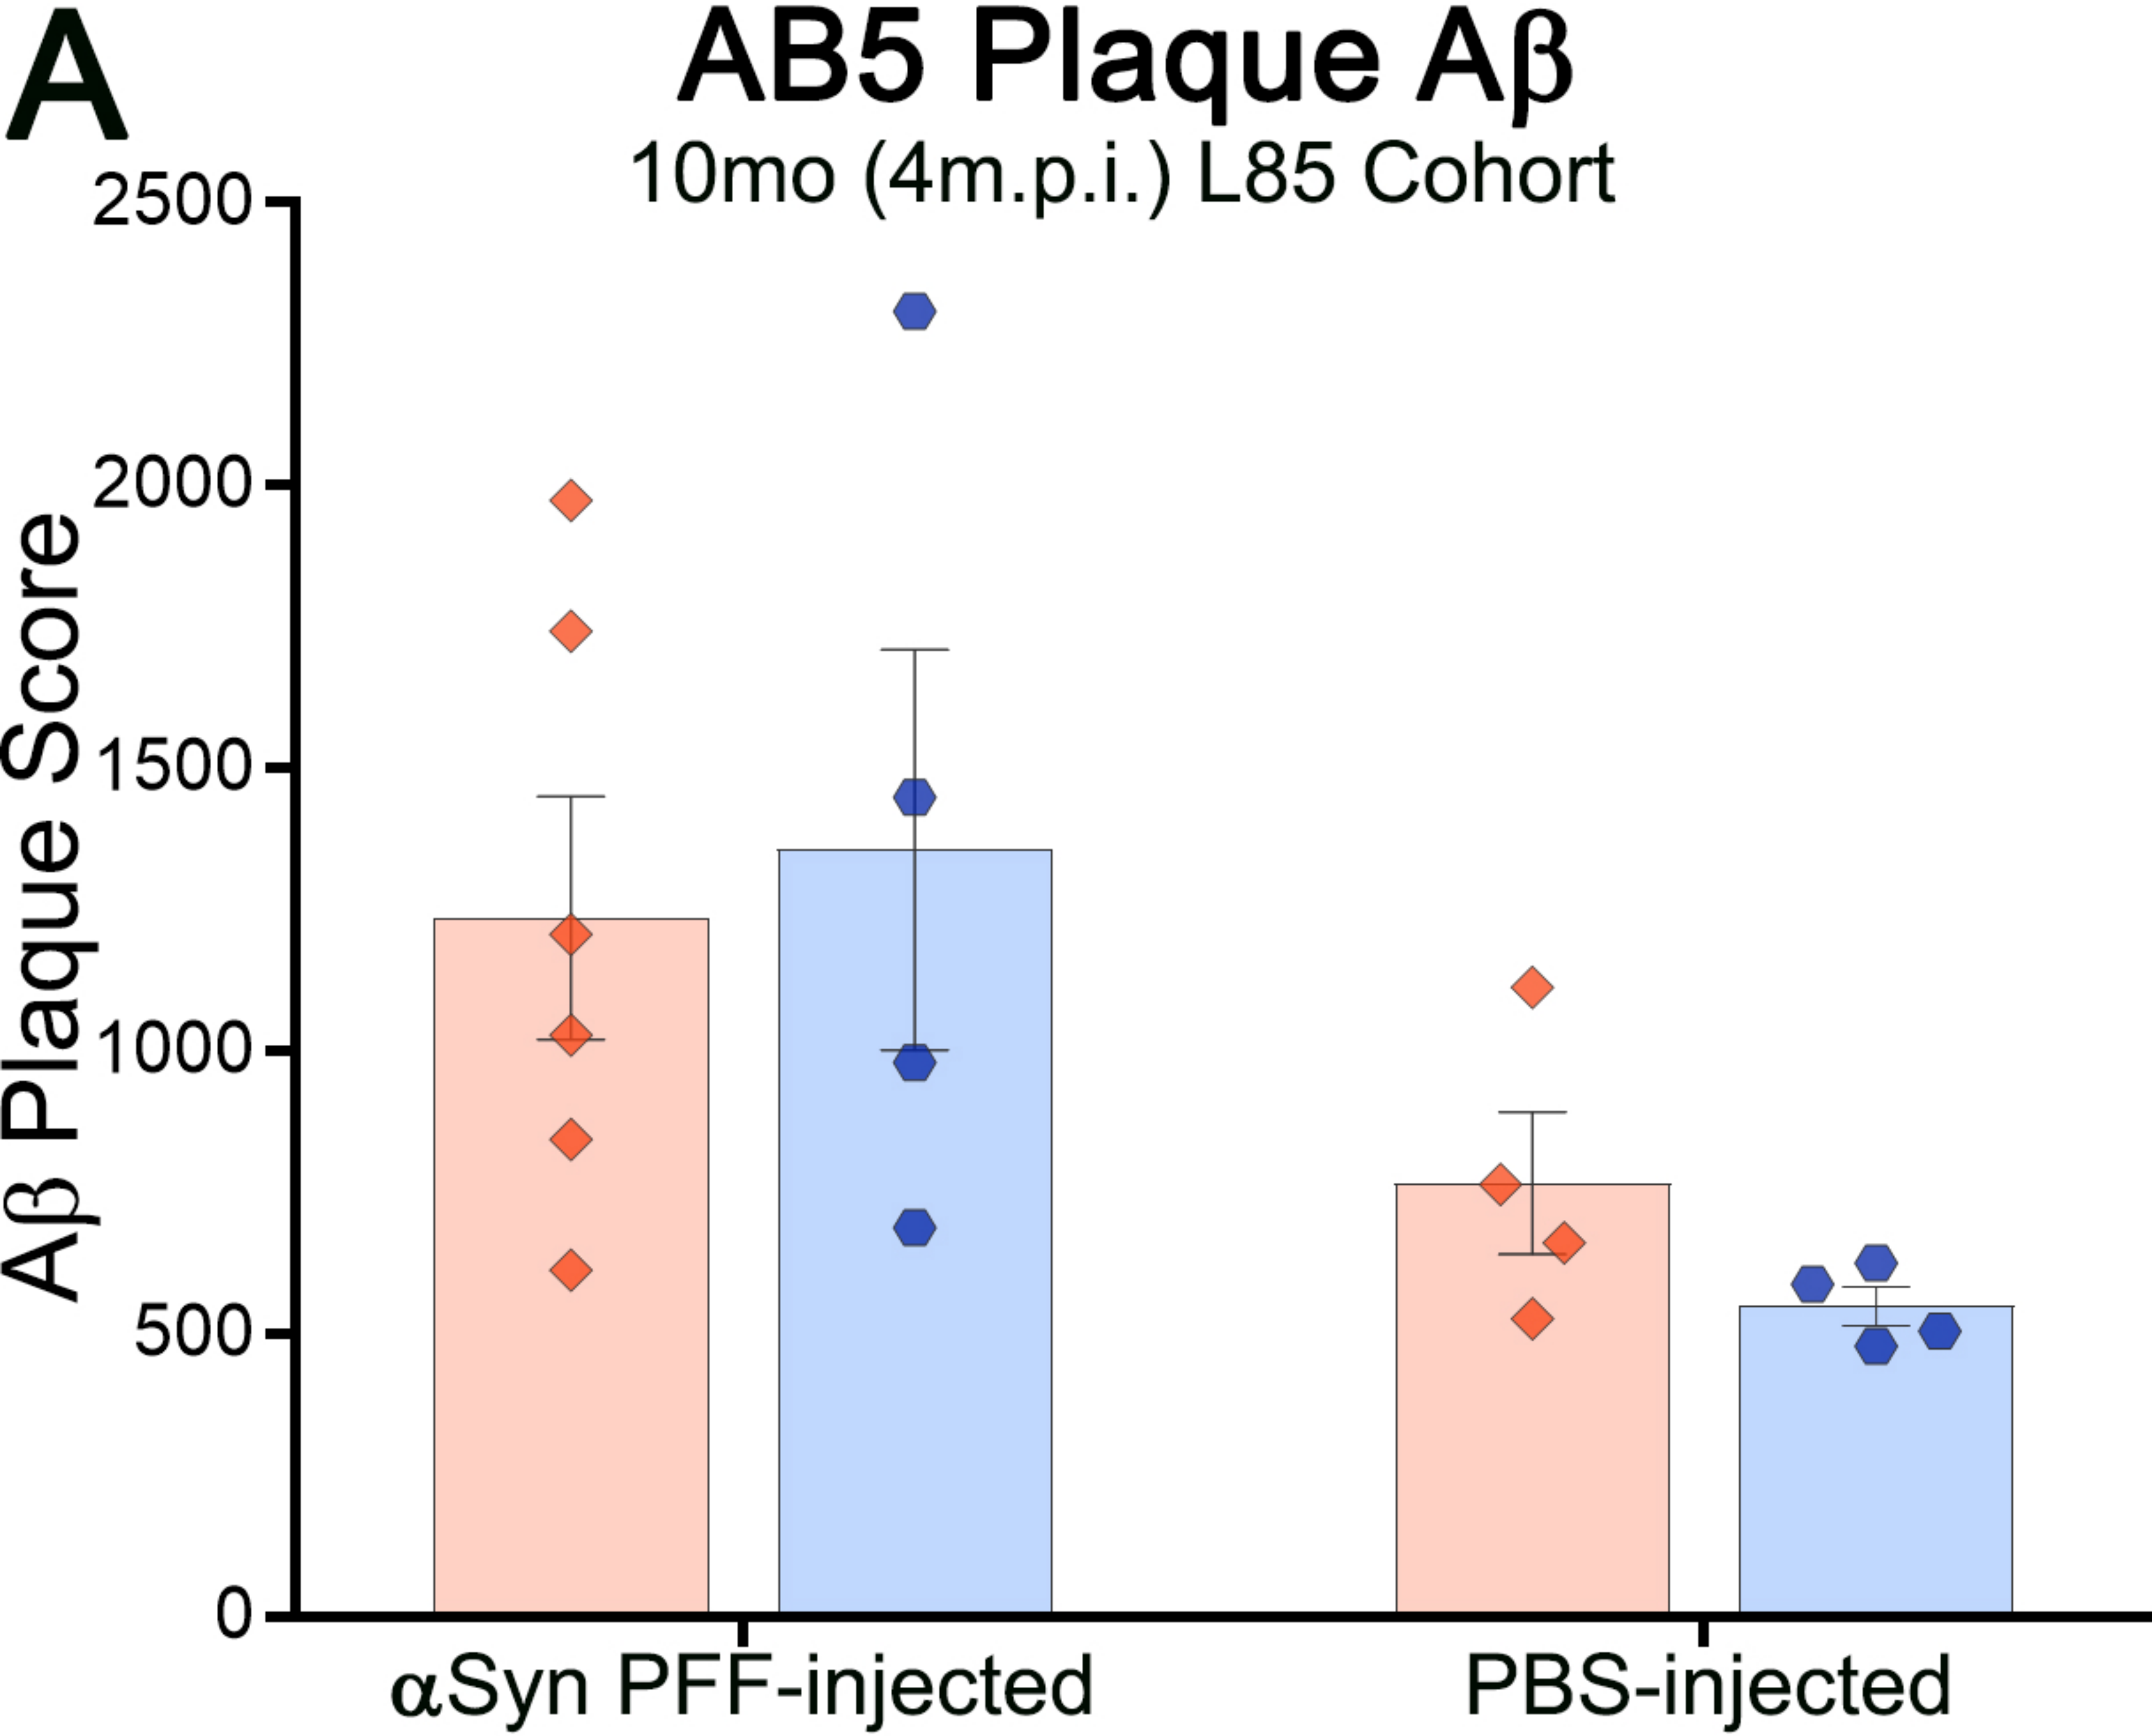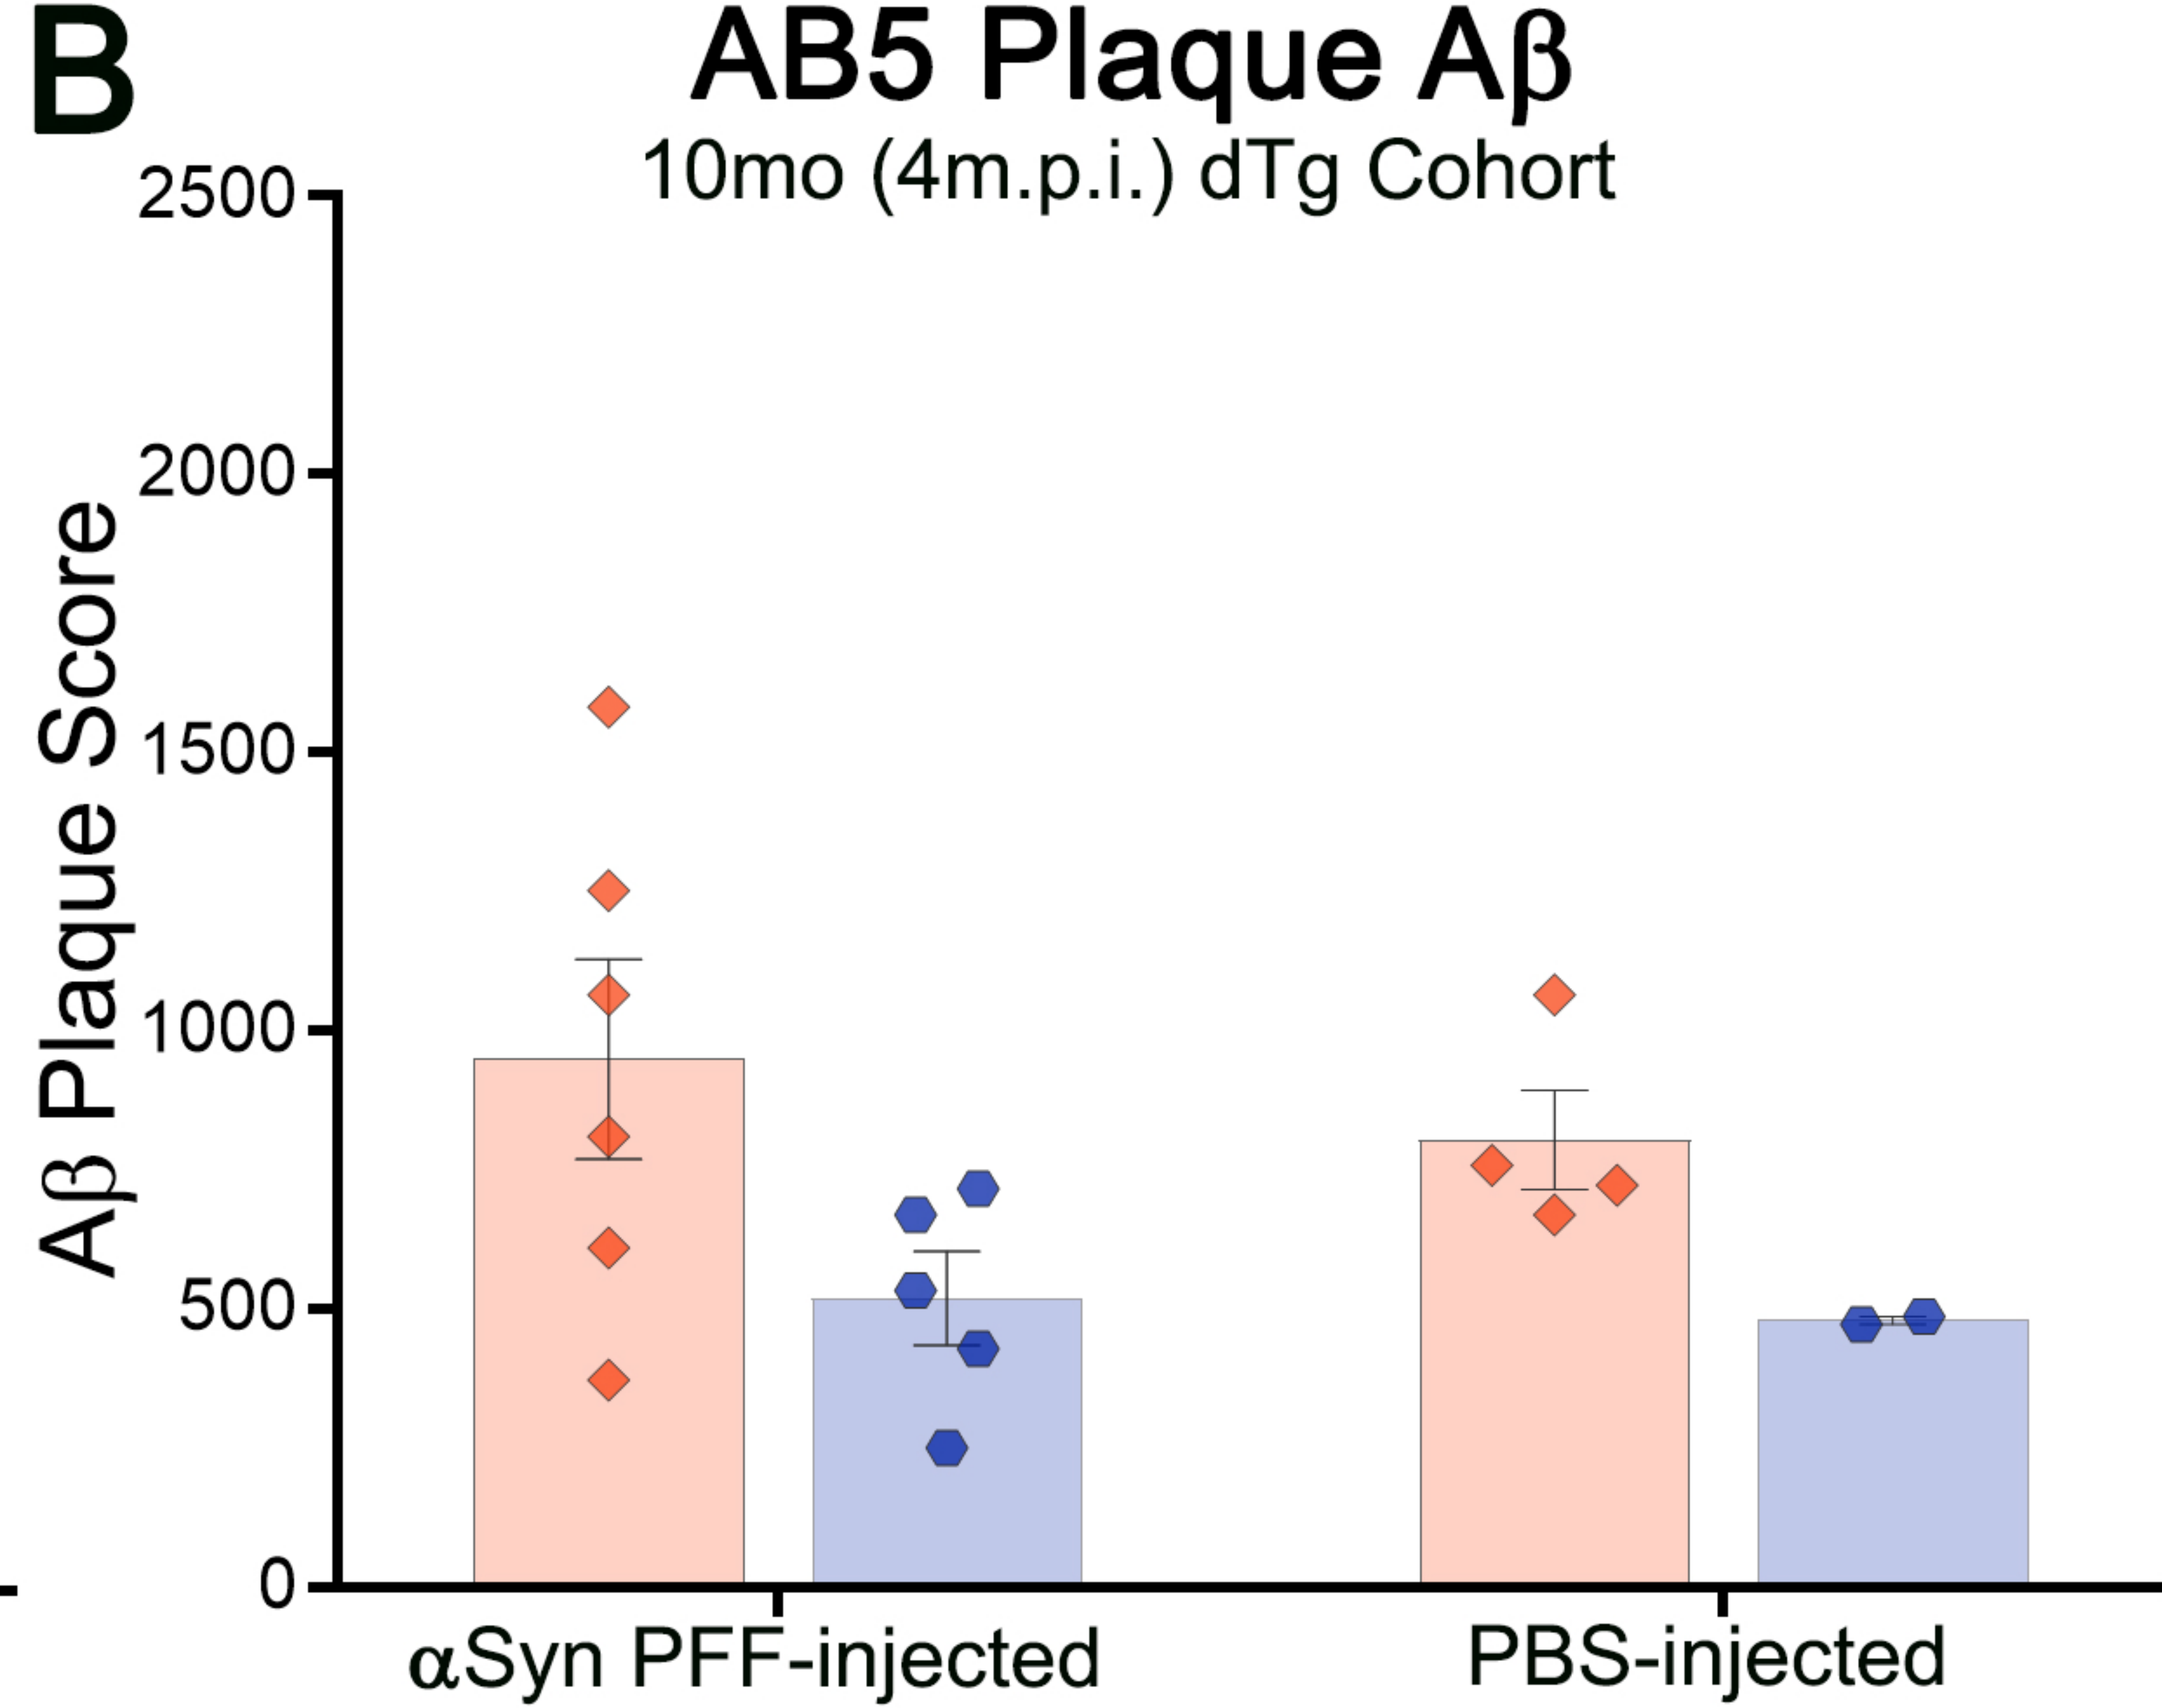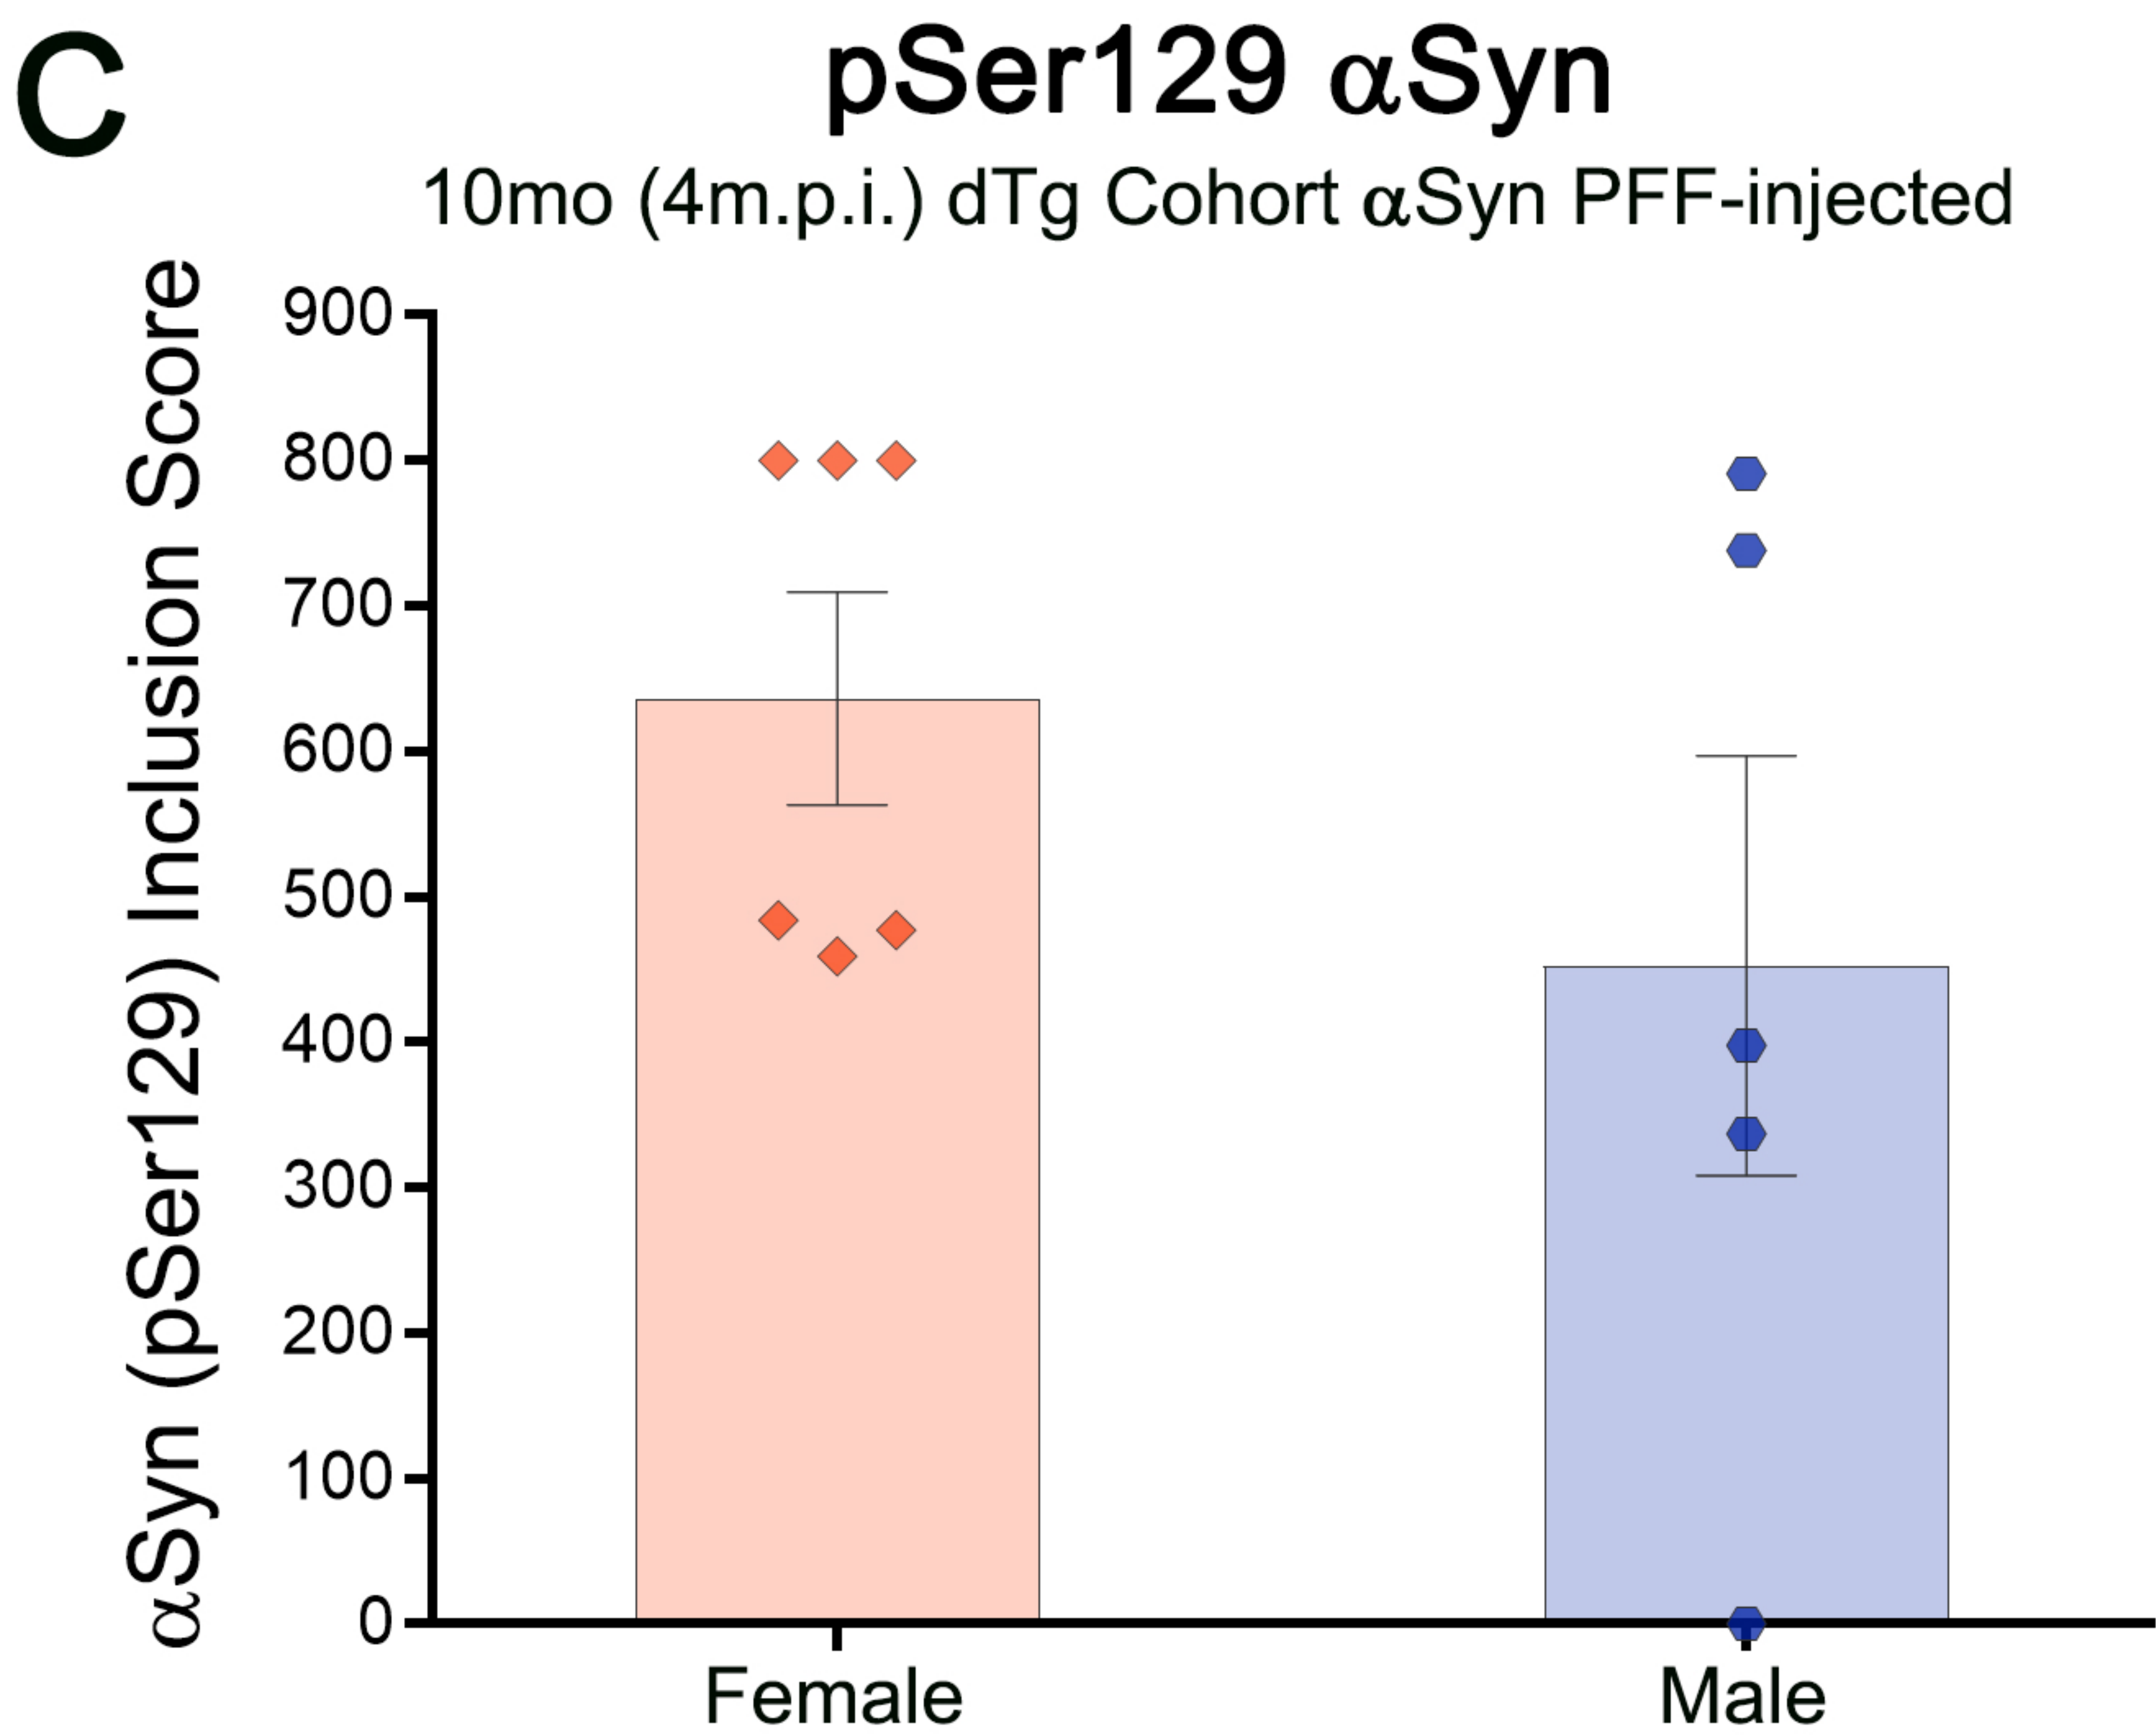

Female

Male
